# Supplementary material
Source: Springer Nature journal article supplement (https://www.springermedizin.de/resource/supplementary/13256_2010_1773_MOESM1_ESM.pdf/9648404)
Supplement: MOESM1 [file 9648404]

Age (years)

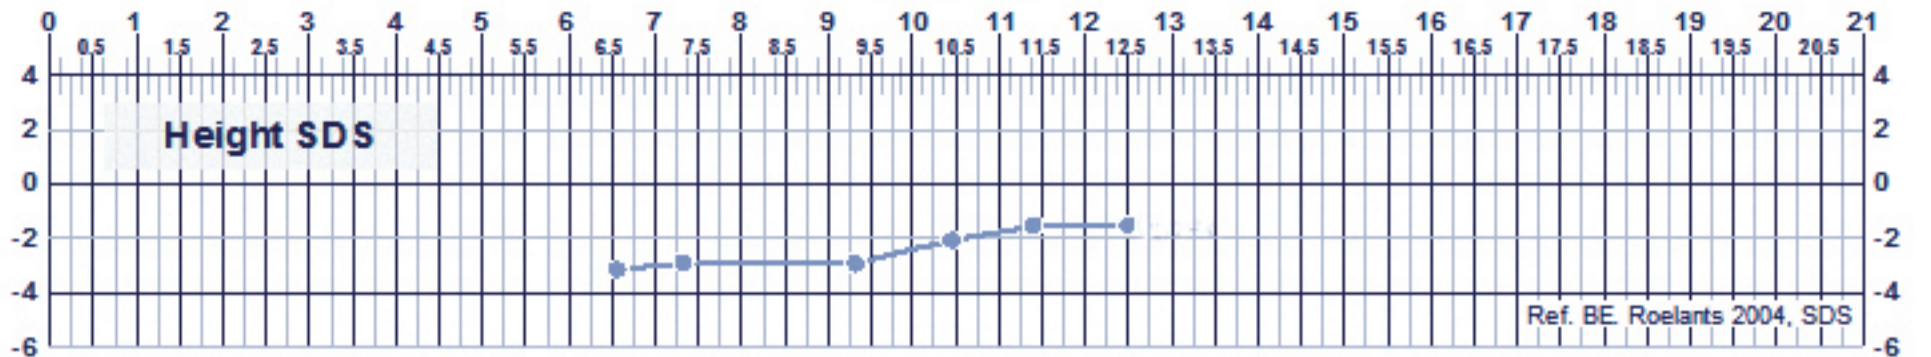

| Age   | Date of visit | Height | Height Velocity (cm/year) |
|-------|---------------|--------|---------------------------|
| 0     | 9/14/1997     | 57.0   |                           |
| 6.57  | 4/8/2004      | 105.0  |                           |
| 7.33  | 1/12/2005     | 110.5  | +5.5                      |
| 9.32  | 1/9/2007      | 120.0  | +4.7                      |
| 10.45 | 2/27/2008     | 130.0  | +10.0                     |
| 11.4  | 2/6/2009      | 138.0  | +8.0                      |
| 12.49 | 3/12/2010     | 144.0  | +6.0                      |

F - Father height 188.0 cm  
M - Mother height 162.0 cm  
MP - Mid-parental height 181.61 cm

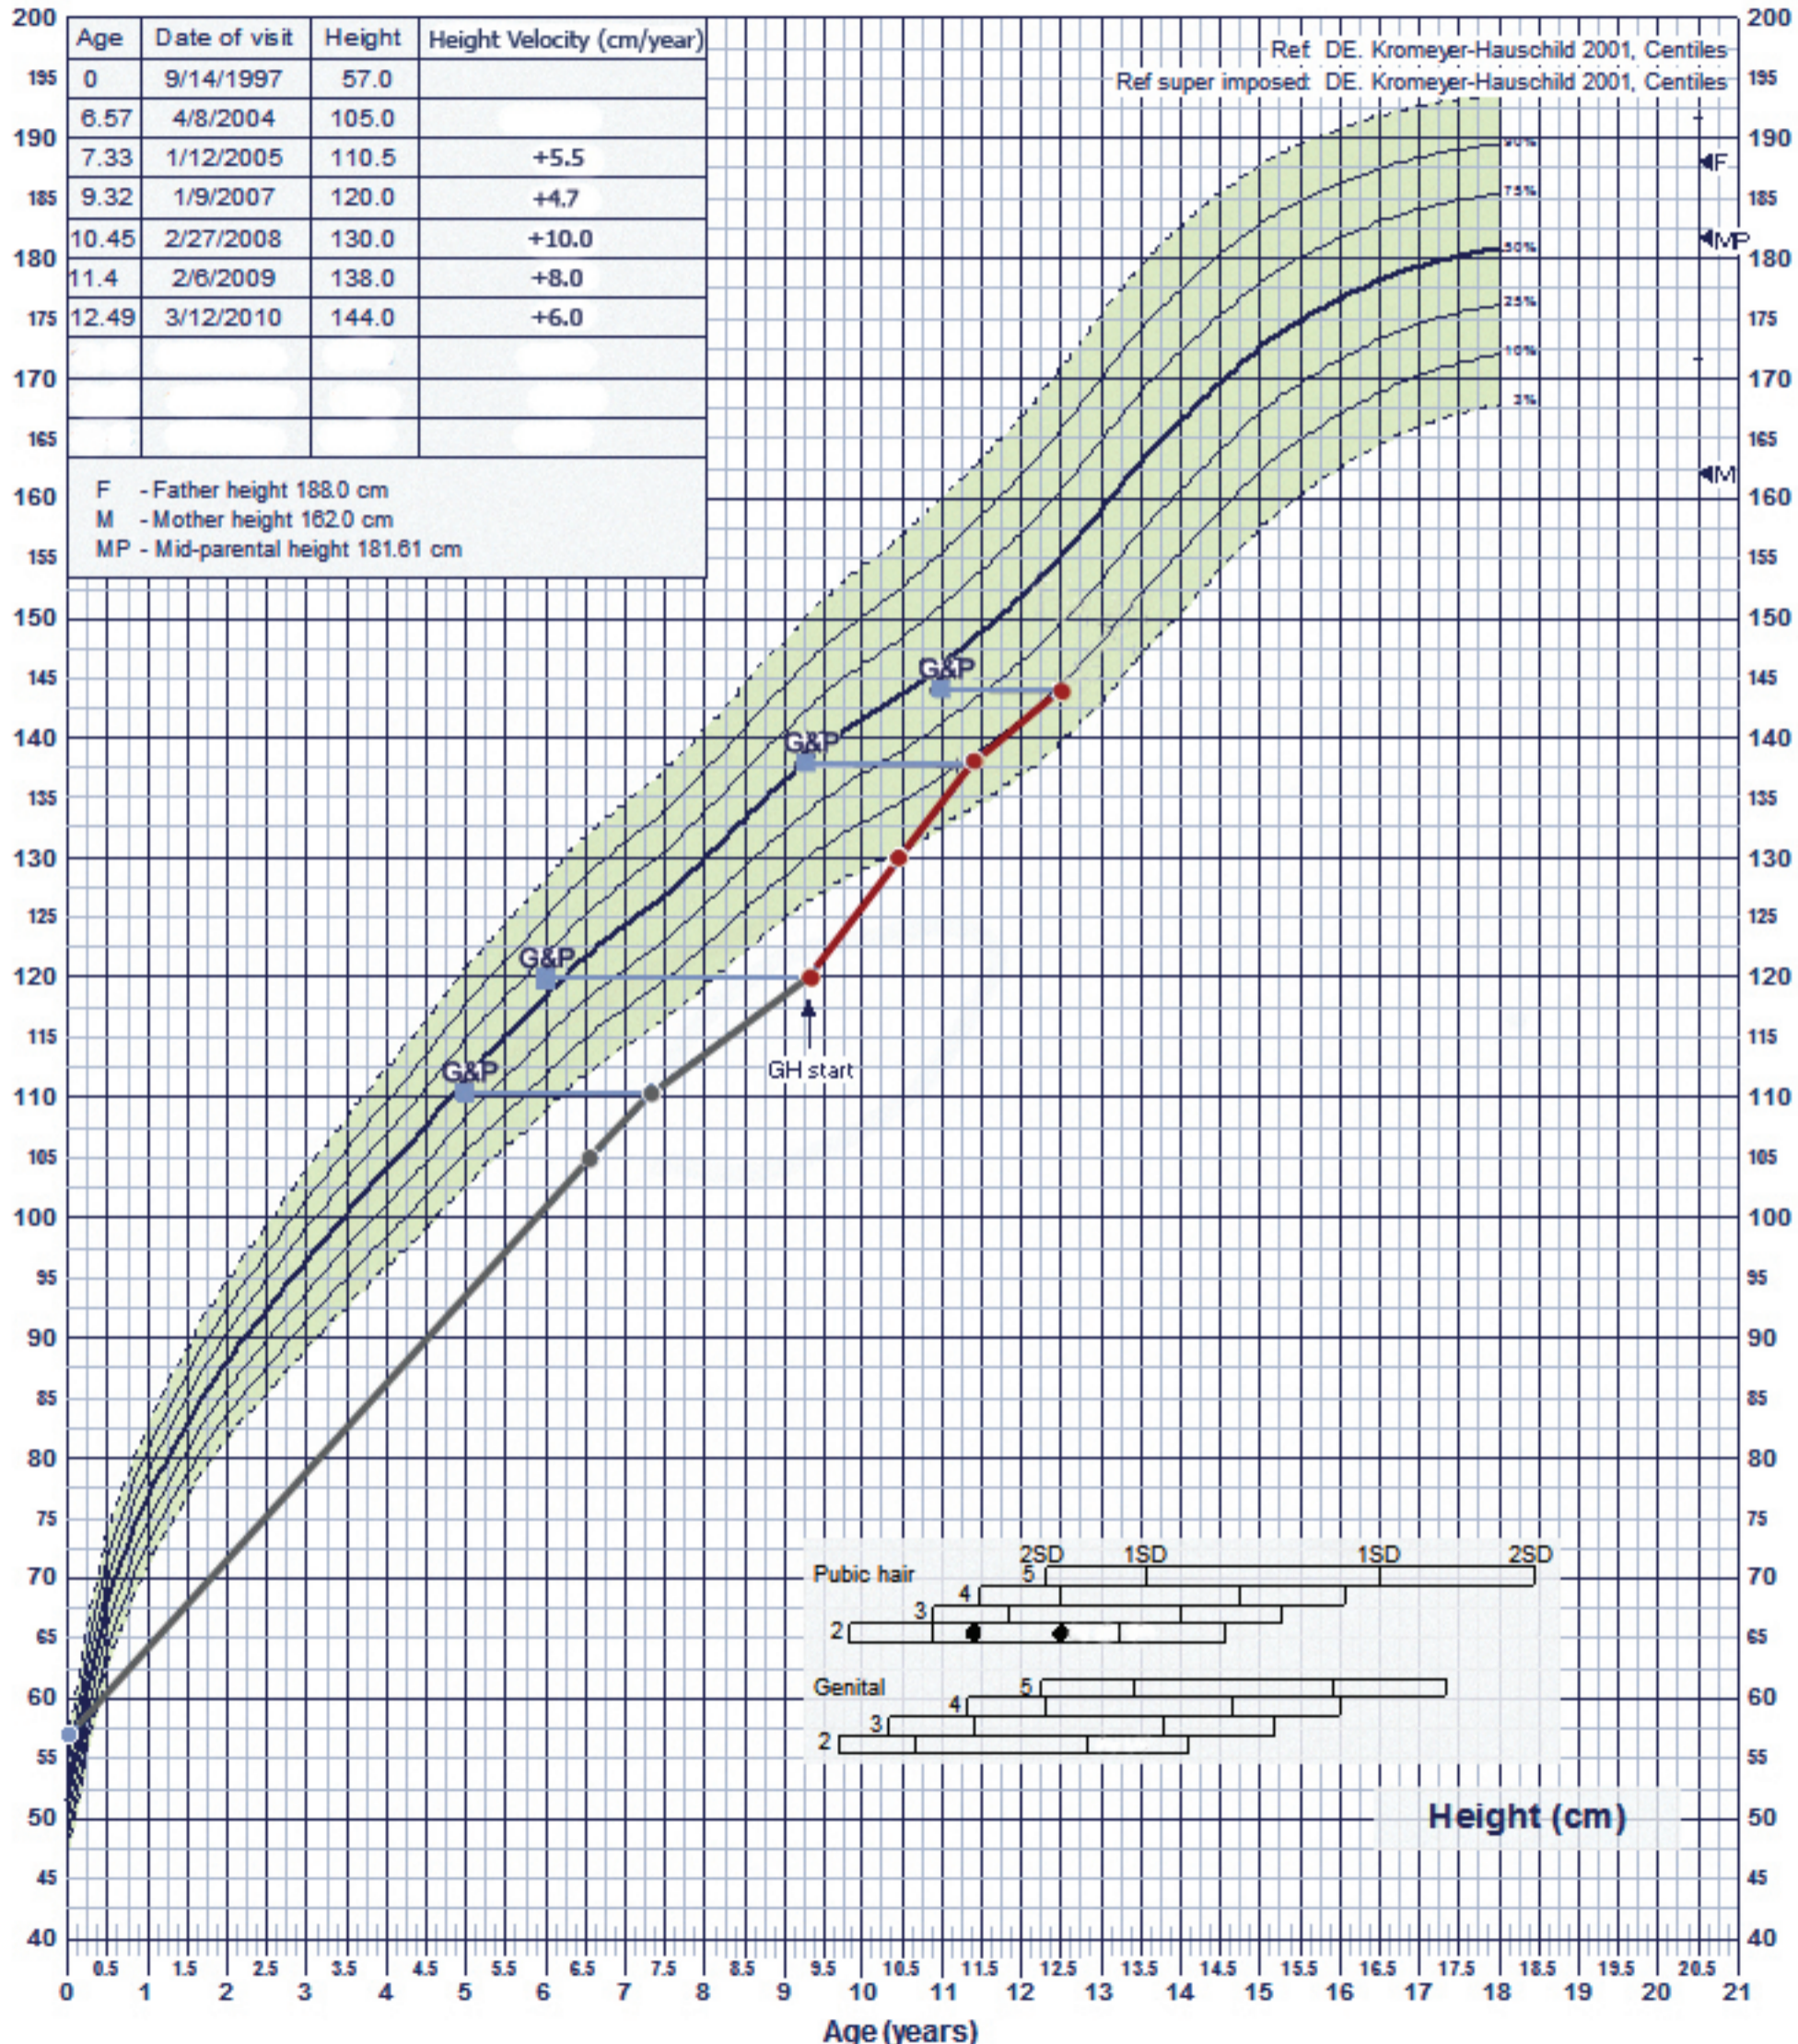

G&P = assessment of bone age by Greulich-Pyle method
